# Supplementary material
Source: Research Square preprint supplement (doi:10.21203/rs.3.rs-9750676/v1)
Supplement: Supplementary file 1 [file 5912f785a4837f9ec26c0df6.docx]

**Table . 1: Season-wise and age-wise prevalence of gastro-intestinal parasites of dogs in Mumbai.**

|  | **Stray** | | | **Pet** | | | **Total** | | **Grand total** |
| --- | --- | --- | --- | --- | --- | --- | --- | --- | --- |
| **Male** | **Female** | **Total** | **Male** | **Female** | **Total** | **Male** | **Female** |
| **Summer**  **(Mar-May)** | 29/69  (42.02) | 26/58  (44.82) | 55/127  (43.30) | 1/15  (6.66) | 0/5  (0) | 1/20  (5) | 30/84  (35.71) | 26/63  (41.26) | 56/147  (38.09) |
| **Monsoon**  **(Jun -Sep)** | 84/204  (41.17) | 113/203  (55.66) | 197/407  (48.40) | 2/10  (20) | 1/8  (12.5) | 3/18  (16.66) | 86/214  (40.18) | 114/211  (54.02) | 200/425*  (47.05) |
| **Winter**  **(Oct-Feb)** | 30/76  (39.47) | 31/74  (41.89) | 61/150  (40.66) | 1/4  (25) | 0/3  (0) | 1/7  (14.28) | 31/80  (38.75) | 31/77  (40.25) | 62/157  (39.49) |
| **Total** | **143/349**  **(40.97)** | **170/335**  **(50.74)** | **313/684**  **(45.76)** | **3/28**  **(10.71)** | **2/16**  **(12.50)** | **5/45**  **(11.11)** | **146/377**  **(38.72)** | **172/352**  **(48.86)** | **318/729**  **(43.62)** |

*Statistically non-significant value (x2= 4.96, p ≤ 0.05)

(figures in parenthesis denotes percentage)

**Table 2 Species-wise prevalence of gastrointestinal parasites of dogs in Mumbai**.

|  | **Summer** | | | | **Monsoon** | | | **Winter** | | | **Annual Prevalence** | | |
| --- | --- | --- | --- | --- | --- | --- | --- | --- | --- | --- | --- | --- | --- |
| **Stray**  **127** | | **Pet**  **20** | **Total**  **147** | **Stray**  **407** | **Pet**  **18** | **Total**  **425** | **Stray**  **150** | **Pet**  **7** | **Total**  **157** | **Stray**  **684** | **Pet**  **45** | **Total**  **729** |
| **A.C** | 29  (22.83) | | 1  (5.00) | 30  (20.41) | 145  (35.63) | 2  (11.11) | 147  (34.59) | 33  (22.00) | 0 | 33  (21.02) | 207  (30.26) | 3  (6.67) | 210  (28.81) |
| **D.C** | 19  (14.96) | | 0 | 19  (12.93) | 32  (7.86) | 1  (5.56) | 33  (7.76) | 12  (8.00) | 0 | 12  (7.64) | 63  (9.21) | 1  (2.22) | 64  (8.78) |
| **D.L** | 0 | | 0 | 0 | 0 | 0 | 0 | 3  (2.00) | 0 | 3  (1.91) | 3  (0.44) | 0 | 3  (0.41) |
| **T.C** | 2  (1.57) | | 0 | 2  (1.36) | 8  (1.97) | 0 | 8  (1.88) | 3  (2.00) | 1  (14.29) | 4  (2.55) | 13  (1.90) | 1  (2.22) | 14  (1.92) |
| **I** | 5  (3.94) | | 0 | 5  (3.40) | 12  (2.95) | 0 | 12  (2.82) | 10  (6.67) | 0 | 10  (6.37) | 27  (3.95) | 0 | 27  (3.70) |
| **Total** | | **55**  **(43.31)** | **1**  **(5.00)** | **56**  **(38.10)** | **197**  **(48.40)** | **3**  **(16.67)** | **201**  **(47.29)** | **61**  **(40.67)** | **1**  **(14.29)** | **62**  **(39.49)** | **313**  **(45.76)** | **5**  **(11.11)** | **318**  **(43.62)** |

(figures in parenthesis denotes percentage)

| **ABBREVATIONS** | | | |  |
| --- | --- | --- | --- | --- |
| A.C.- *Ancylostoma* spp. | D.C. - *Dipylidium caninum* | D.L. *– Diphyllobothrium latum* | T.C. – *Toxocara canis* | I – *Isospora canis* |

**Table . 3 Annual prevalence of different species of gastro-intestinal parasites in pups and adult dogs in Mumbai:**

| **Sr.no** | **Species of parasite** | **Pups**  **(83)** | **Adults**  **(646)** | **Total**  **(729)** |
| --- | --- | --- | --- | --- |
| 1 | ***Ancylostoma* spp.** | 30  (36.14) | 180  (27.86) | 210  (28.81) |
| 2 | ***Toxocara canis*** | 11  (13.25) | 3  (0.46) | 14  (1.92) |
| 3 | ***Dipylidium caninum*** | 5  (6.02) | 59  (9.13) | 64  (8.77) |
| 4 | ***Diphyllobothrium latum*** | 0 | 3  (0.46) | 3  (0.41) |
| 5 | ***Isospora* spp.** | 3  (3.61) | 24  (3.71) | 27  (3.70) |
| **Total** | | **49***  **(59.03)** | **269***  **(41.64)** | **318**  **(43.62)** |

*statistically significant value (x2 =8.56, p≤ 0.01)

Figures in paranthesis denotes percentage.

**Table no. 4 Season-wise and age wise prevalence of hookworms:**

|  | **Total examined** | | | **Hookworm positive samples** | | **Total** |
| --- | --- | --- | --- | --- | --- | --- |
|  | **Male** | **Female** | **Male** | **Female** |
| **AGE** | Puppy < 3mnths | 38 | 43 | 12  (31.57%) | 18  (41.86%) | 30/81  (37.03%) |
| Adult | 339 | 309 | 79  (23.30%) | 88  (28.47%) | 180/648  (27.77%) |
| **CATEGORY OF DOG** | Stray | 349 | 335 | 89  (25.50%) | 118  (35.22%) | 207/684  (30.26%) |
| Pet | 32 | 13 | 2  (6.25%) | 1  (7.69%) | 3/45  (6.52%) |
| **SEASON** | Summer | 78 | 56 | 18  (23.07%) | 12  (21.42%) | 30/147  (20.40%) |
| Monsoon | 210 | 263 | 57  (27.14%) | 90  (34.22%) | 147/425  (34.59%) |
| Winter | 64 | 58 | 16  (25%) | 17  (29.31%) | 33/157  (21.01%) |
| **Grand Total** | | | | **210/729**  **(28.80% )** | | |
